# Supplementary material for: Cluster analysis of heart rate variability reveals subgroups with preserved and early- impaired autonomic regulation in amyotrophic lateral sclerosis
Source: Research Square preprint supplement (doi:10.21203/rs.3.rs-7862037/v1), 2025-12-05
Supplement: Supplementary file 1 [file 78cc077b43587da288bf61d4.xlsx]

## Sheet: n45v2_Tab2
Table 2. Group comparisons of heart rate variability and heart rate at Rest phase
	Control subjects (n = 11)		Overall patients (n = 45)			Group 1 Early-preserved (n = 18)			Group 2 Late-preserved (n = 10)			Group 3 Late-preserved (n = 17)
					p value			p value			p value			p value
HF	135	102	47.99	138.16	0.008	45.9	54.32	0.003	163.6	237.27	0.916	14.45	87.1	0.006
LF	129.28	136.33	117.2	197.13	0.302	124.71	163.7	0.458	225.31	175.6	0.647	70.66	85.7	0.06
LF/HF	1.28	1.09	3.18	3.64	0.002	3.47	3.2	0.004	1.8	0.68	0.17	3.73	4.2	0.001
HR	72.7	10.7	76.89	17.67	0.201	76.78	19	0.216	70.56	9.53	0.597	82.04	27.3	0.048
Data are represented as median values (interquartile range). Group comparisons were performed between the control group and each ALS group using the Mann-Whitney U test. ALS: amyotrophic lateral sclerosis; HF: high-frequency component; LF: low-frequency component; HR: heart rate.
