# Supplementary material for: Cluster analysis of heart rate variability reveals subgroups with preserved and early- impaired autonomic regulation in amyotrophic lateral sclerosis
Source: Research Square preprint supplement (doi:10.21203/rs.3.rs-7862037/v1), 2025-12-05
Supplement: Supplementary file 2 [file 84a30479262bf315a6ea373a.xlsx]

## Sheet: n45v2_Tab3
Table 3. Group comparisons of ratios of heart rate variability and heart rate between control subjects and patients with ALS
	Control subjects (n = 11)		Overall patients with ALS (n = 45)		p value*	Group 1 Early-preserved (n = 18)		Group 2 Late-preserved (n = 10)		Group 3 Late-impaired (n = 17)		p value**	Post-hoc test (p value only)***
													Control vs Group 1	Control vs Group 2	Control vs Group 3
HF
Task/Rest	0.26	0.26	0.87	0.62	<0.001	0.87	0.69	0.73	0.5	1.01	0.49	0.005	0.01	0.12	0.002
After/Task	4.09	3.7	1.07	0.79	<0.001	0.98	0.85	1.37	0.41	0.93	1.01	<0.001	<0.001	0.032	<0.001
LF
Task/Rest	0.85	1.97	0.91	0.98	0.695	0.91	0.87	1.19	1.74	0.99	0.93	0.911	-	-	-
After/Task	1.15	2.3	0.94	0.84	0.342	0.97	0.8	1.6	2.77	0.87	0.62	0.22	-	-	-
LF/HF
Task/Rest	4.87	3.58	1.19	1.08	<0.001	1.06	0.78	1.87	2.95	1.06	0.62	0.004	0.005	0.221	0.002
After/Task	0.25	0.53	0.88	1.18	0.00183326	0.9	1.25	1.3	2.27	0.79	0.64	0.02	0.013	0.05	0.032
HR
Task/Rest	1.13	0.09	1.01	0.04	<0.001	1.01	0.04	1.03	0.05	1.01	0.03	<0.001	<0.001	0.16	<0.001
After/Task	0.88	0.1	0.98	0.04	<0.001	0.98	0.05	0.94	0.06	0.98	0.02	<0.001	<0.001	0.423	<0.001
Data are represented as median values (interquartile range). *Group comparisons were performed between the control group and overall ALS patients using the Mann-Whitney U test. **Group comparisons were performed using the Kruskal-Wallis test. ***Post-hoc test were performed using the Dunn test for pair of groups that had a significant on Kruskal wallis tets. ALS: amyotrophic lateral sclerosis; HF…
