# Supplementary material for: Cluster analysis of heart rate variability reveals subgroups with preserved and early- impaired autonomic regulation in amyotrophic lateral sclerosis
Source: Research Square preprint supplement (doi:10.21203/rs.3.rs-7862037/v1), 2025-12-05
Supplement: Supplementary file 3 [file b71bdef5993c4bdcd25c7506.xlsx]

## Sheet: n45v2_Tab1
Table 1. Patient characteristics
	Overall ALS patients (n = 45)		Cluster groups						p value
			Group 1 Early-preserved group (n = 18)		Group 2 Late-preserved group (n = 10)		Group 3 Late-impaired group (n = 17)
Male	23	51.1	11	61.1	4	40	8	47.1	0.515
Age at onset (years)	62	12	62	15.5	55.5	16.75	63	6	0.484
Age at examination (years)	64	15	62	14.8	59.5	16.75	66	9	0.758
Disease duration (months)	27	28	15	10.3	51.5	14.5	45	23	<0.001
ALSFRS-R	38	12	40.5	7.3	38	2.5	23	9	<0.001
ΔALSFRS-R	0.41	0.45	0.4	0.5	0.21	0.1	0.5	0.4	<0.001
BMI (kg/m2)	20.36	4.48	21.6	4.4	22.23	3.47	19.5	2.6	0.007
ΔBMI (kg/m2)	0.04	0.1	0.03	0.2	0.01	0.03	0.07	0.06	0.034
FVC (%)	77.53	40.07	87.8	21.6	100.69	14	39.5	15.1	<0.001
ΔFVC (%)	0.95	1.42	1	1.8	-0.01	0.3	1.2	1.4	<0.001
EN	19	42.22	2	11.1	2	10	15	88.2	<0.001
NIV	11	24.44	2	11.1	0	0	9	52.9	0.001
Onset site
Upper limb	22	48.89	11	61.1	6	60	5	29.4	0.125
Lower limb	12	26.67	4	22.2	4	40	4	25.5	0.555
Bulbar	13	28.89	5	27.8	1	10	7	41.2	0.223
Data are represented as median (interquartile rnage) or number (percentage). Group comparisons were performed using the Kruskal-Wallis test for non-parametric data or Chi-square test as appropriate. ALS: amyotrophic lateral sclerosis; ALSFRS-R: Amyotrophic Lateral Sclerosis Functional Rating Scale-Revised; ΔALSFRS-R: monthly ALSFRS-R decline; BMI: body-mass index; ΔBMI: monthly BMI decline; FVC: …
